# Supplementary material for: Fluorometric sensing of hydroxylamine in an aqueous medium utilizing a diphenyl imidazole-based probe
Source: Royal Society of Chemistry journal article supplement (doi:10.1039/d0ob00608d), 2020-01-01
Supplement: d0ob00608d1.pdf [file d0ob00608d1.pdf]

***Electronic Supplementary Information for***

**Fluorometric sensing of hydroxylamine in an aqueous medium utilizing a diphenyl  
imidazole-based probe**

Punam Rana,<sup>a</sup> Lipsarani Panda,<sup>a</sup> Narayan Murmu,<sup>a</sup> Bhawani Prasad Bag<sup>b</sup> and  
Satya Narayan Sahu\*<sup>a</sup>

<sup>a</sup> *School of Chemistry, Sambalpur University, Jyoti Vihar, Burla-768 019, Odisha, India*

Email: snsahu.chem@gmail.com; snsahu@suniv.ac.in

<sup>b</sup> *Department of Biotechnology and Bioinformatics, Sambalpur University, Jyoti Vihar, Burla-  
768 019, Odisha, India*

## 1. Materials and preparation of the test samples

All the solvents and reagents (analytical grade and spectroscopic grade) were obtained from Merck (India), Spectrochem Pvt. Limited (India) and Sigma-Aldrich and were used without further purification. A 1.0 mM **DIB** stock solution was prepared in UV-grade dimethyl sulphoxide (DMSO) and subsequently diluted to 50  $\mu\text{M}$  in 5% DMSO phosphate buffer solution at pH 7.4 for various photophysical studies. Stock solutions of metal ions such as  $\text{Ag}^+$ ,  $\text{Ba}^{2+}$ ,  $\text{Ca}^{2+}$ ,  $\text{Cd}^{2+}$ ,  $\text{Co}^{2+}$ ,  $\text{Cu}^{2+}$ ,  $\text{Cr}^{2+}$ ,  $\text{Fe}^{2+}$ ,  $\text{Hg}^{2+}$ ,  $\text{Mg}^{2+}$ ,  $\text{Mn}^{2+}$ ,  $\text{Ni}^{2+}$ ,  $\text{Pb}^{2+}$ ,  $\text{Pd}^{2+}$ ,  $\text{Zn}^{2+}$  were prepared at 1.0 mM concentration in Millipore water from their respective perchlorate, nitrate or chlorides salts for cation interaction studies. Similarly for anionic interaction studies, 1.0 mM stock solutions of anions such as  $\text{F}^-$ ,  $\text{Cl}^-$ ,  $\text{Br}^-$ ,  $\text{I}^-$ ,  $\text{H}_2\text{PO}_4^-$ ,  $\text{HSO}_4^-$ ,  $\text{OH}^-$ ,  $\text{AcO}^-$  (as tetrabutyl ammonium salts),  $\text{CN}^-$  (as KCN salt) and  $\text{S}^{2-}$  (as  $\text{Na}_2\text{S}$  salt) were prepared in Millipore water. The interaction of neutral amines such as urea, thiourea, aniline, triethylamine, ammonium hydroxide, hydroxyl amine, ethylene diamine, piperidine, hydrazine hydrate and methyl amine were studied by preparing stock solutions in the range of 10-100 mM concentration in Millipore water. The aggregation induced emission (AIE) characteristics of **DIB** (50  $\mu\text{M}$ ) was studied in UV-grade DMSO with varying water fractions. The solvatofluorism behaviour of **DIB** (50  $\mu\text{M}$ ) was examined with various solvents such as benzene, toluene, tetrahydrofuran, dioxane, acetone, methanol, acetonitrile and DMSO.

## 2. General methods

$^1\text{H}$  NMR was recorded on an Avance III-400 MHz Bruker spectrometer. Chemical shifts are reported in parts per million from tetramethylsilane with the solvent (DMSO- $d_6$ : 2.5 ppm) resonance as the internal standard. Data are reported as follows: chemical shifts, multiplicity (s singlet, (d=doublet, t=triplet, m=multiplet), coupling constant (Hz).  $^{13}\text{C}$  NMR (100 MHz) spectra were recorded on an Avance III-400 MHz Bruker spectrometer in proton decoupling mode. Chemical shifts are reported in ppm from tetramethylsilane with the solvent resonance as the internal standard (DMSO- $d_6$ : 39.51 ppm). Fluorescence emission spectra were recorded on a Hitachi F-7000 fluorescence spectrophotometer. Hydrodynamic diameters were measured using Malvern Zetasizer instrument. Mass spectrum was measured on Xevo G2S QToF Mass analyser (Waters). FTIR spectra were recorded on Eco-ATR, Alpha, Bruker Optik GmbH, Ettlingen, Germany. pH readings were measured on UTECH CON-700 digital pH meter. Elemental analysis was carried out by using Elementar Vario EL III CHNS. Chromatographic purification

was done using 60–120 mesh silica gels (Merck). For reaction monitoring, manually coated silica gel-60 thin layer chromatography (TLC) glass plates were used.

### 3. Synthesis of the probe **DIB**

The probe 4-(4,5-diphenyl-1*H*-imidazol-2-yl)benzaldehyde (**DIB**) was synthesized through a straightforward protocol as depicted in Scheme S1. 0.2 gm (0.95 mmol) of benzil and 0.1276 gm (0.95 mmol) of terephthalaldehyde were taken in a 100 ml round bottom flask and dissolved in 30 ml of glacial acetic acid. Then the mixture was kept at room temperature (27 °C) for 2 hours under continuous stirring. After two hours, ammonium acetate (0.5 gm) was added and the mixture was further refluxed at 120 °C on an oil bath till completion of the reaction as monitored by thin layer chromatography. After end of the starting materials, the reaction mixture was poured into ice cold water and the precipitates obtained were washed with water and dried. Then the residues were purified by silica gel column chromatography with hexane/ethylacetate (95:5, v/v) as eluent to afford the probe **DIB** as yellow colour solid (154 mg, 47%) MP: 237-239 °C. <sup>1</sup>H NMR (400 MHz, DMSO-*d*<sub>6</sub>) δ (ppm) 13.03 (1H, s, NH), 10.03 (1H, s, CHO), 8.30 (2H, d, *J* = 8 Hz, Ar-H), 8.01 (2H, d, *J* = 8 Hz, Ar-H), 7.58-7.23 (m, 10H, Ar-H). <sup>13</sup>C NMR (100 MHz, DMSO-*d*<sub>6</sub>) δ (ppm) 193.0, 144.7, 138.6, 135.9, 135.8, 135.2, 131.1, 130.6, 130.0, 129.2, 129.0, 128.8, 128.6, 127.6, 127.3, 125.9. FTIR (KBr, ν cm<sup>-1</sup>) 3355 (-NH str.), 1695 (-C=O str), 1442 (C=C str), 1203, 1164, 1073, 969, 833, 775, 697. ESI-MS *m/z*: calcd for C<sub>22</sub>H<sub>16</sub>N<sub>2</sub>O [M+H]<sup>+</sup>: 325.38; found 325.33. Elemental analysis: C<sub>22</sub>H<sub>16</sub>N<sub>2</sub>O: calcd. C 81.46, H 4.97, N 8.64; found: C 81.35, H 5.07, N 8.53%.

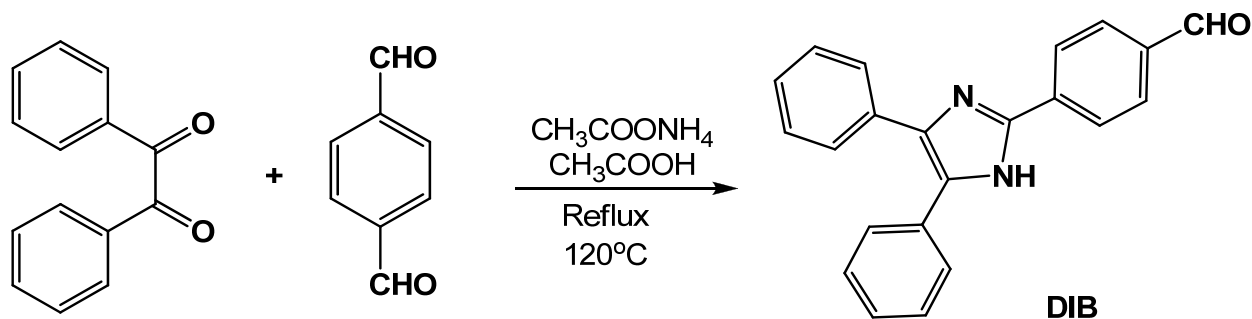

**Scheme S1.** Synthesis protocol for probe **DIB**

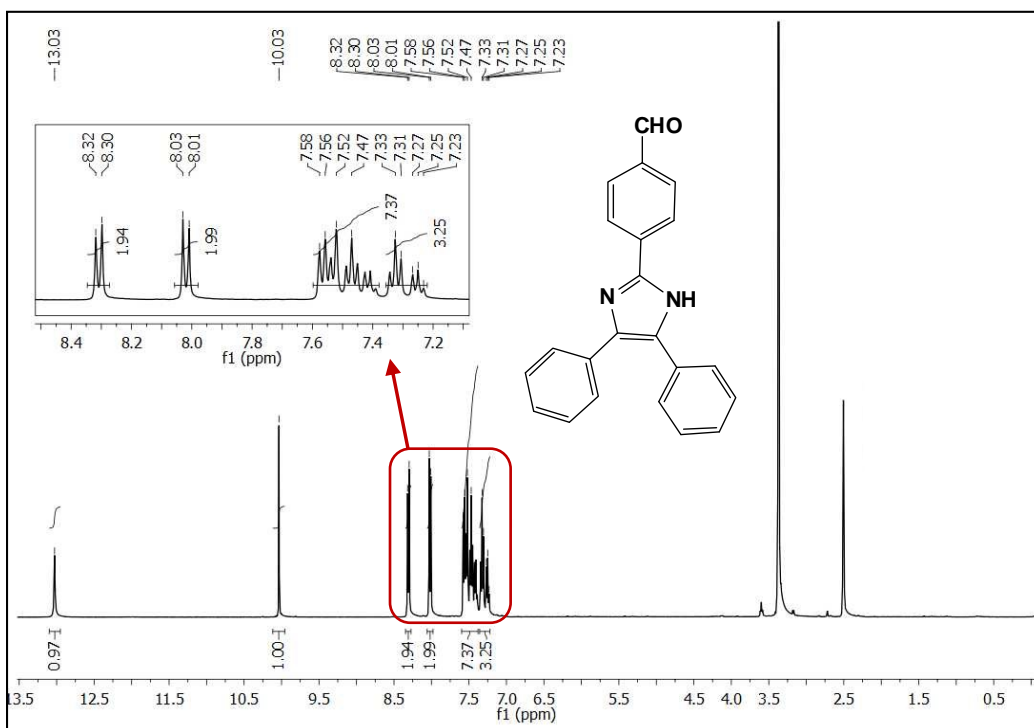

**Fig. S1.**  $^1\text{H}$  NMR spectrum of **DIB** in  $\text{DMSO-}d_6$

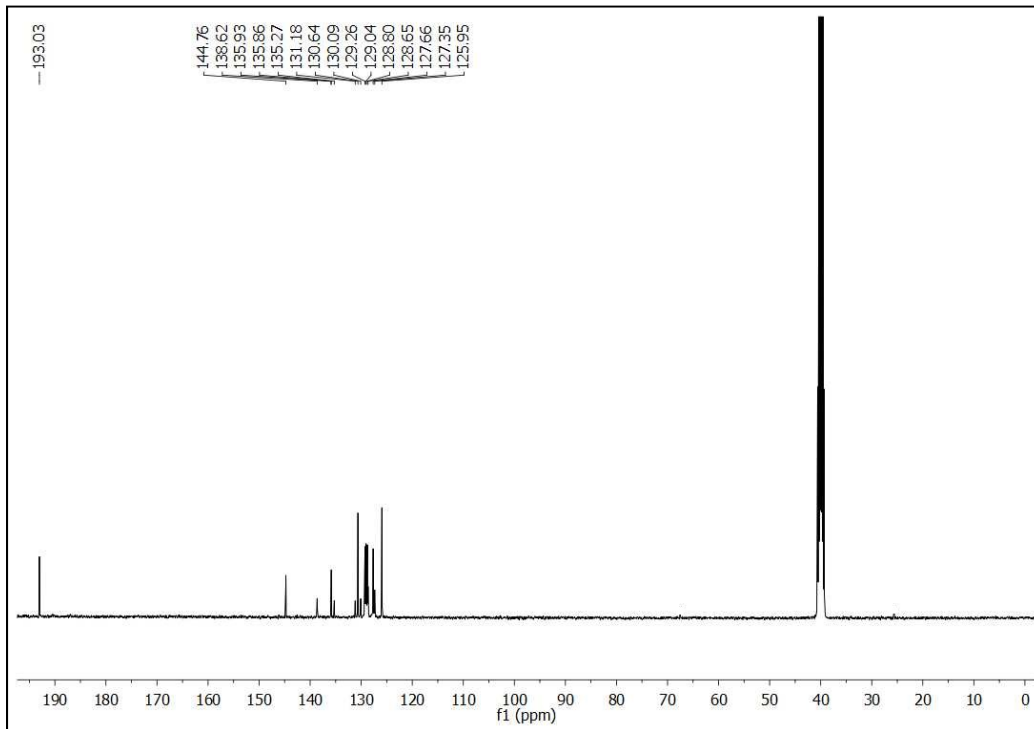

**Fig. S2.**  $^{13}\text{C}$  NMR spectrum of **DIB** in  $\text{DMSO-}d_6$

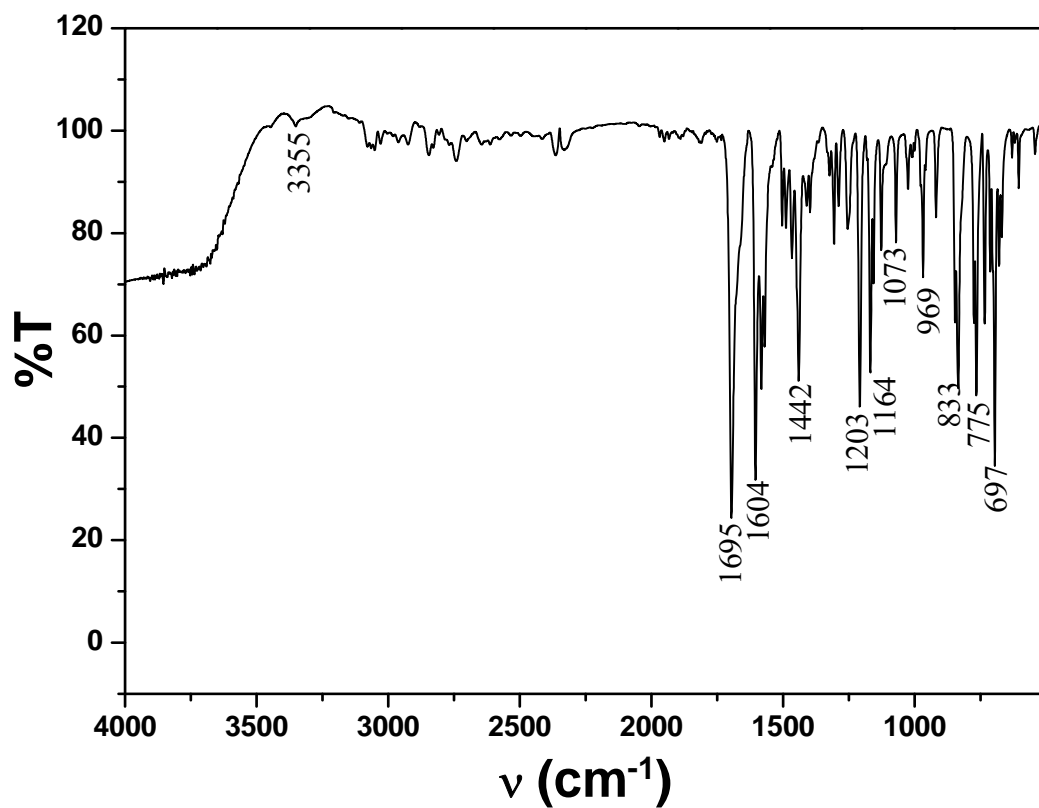

Fig. S3. FTIR spectra of DIB

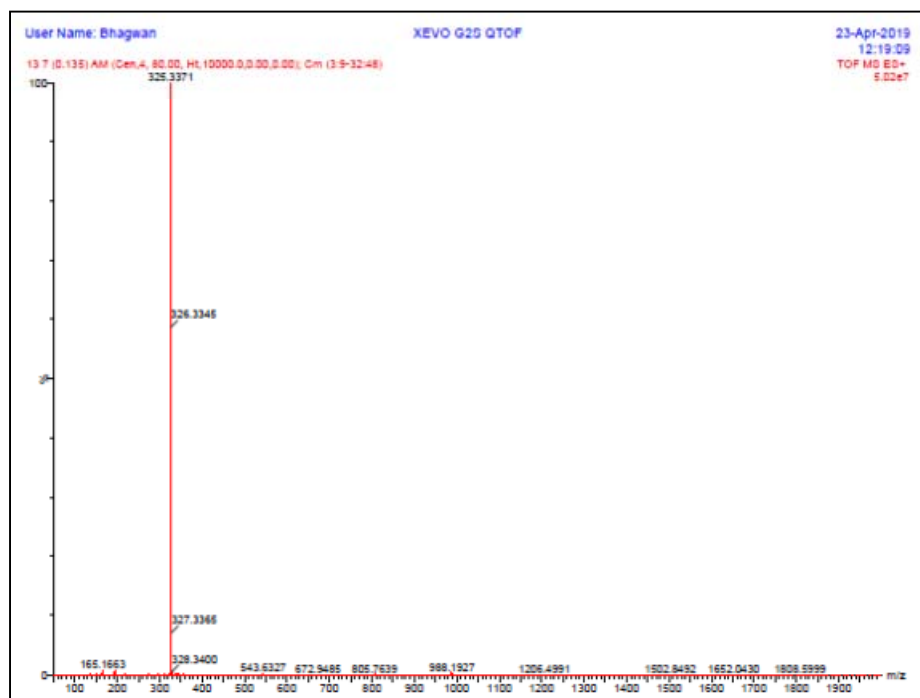

Fig. S4. ESI mass spectrum of DIB

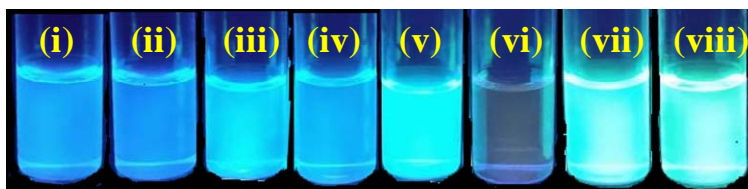

**Fig. S5.** Visual photograph of **DIB** (50  $\mu\text{M}$ ) under UV light at 365 nm in (i) benzene (ii) toluene (iii) tetrahydrofuran (THF) (iv) dioxane (v) acetone (vi) methanol (vii) acetonitrile (viii) dimethyl sulphoxide (DMSO) solvent medium.

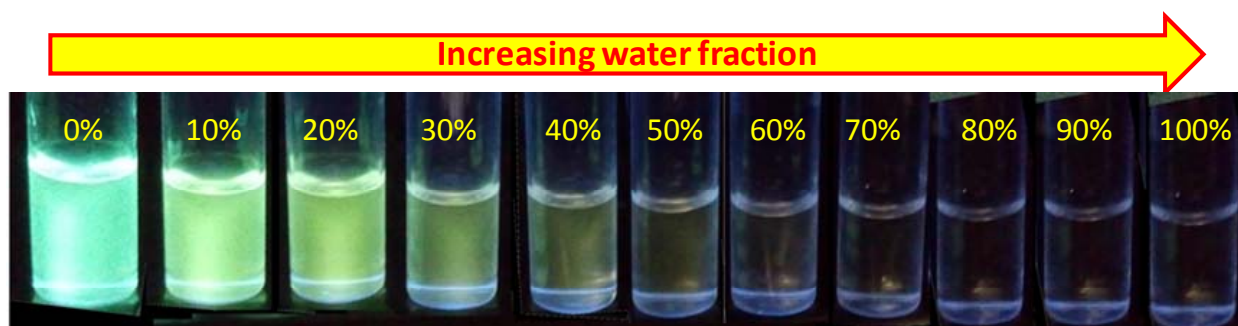

**Fig. S6.** Visual observation of probe **DIB** (50  $\mu\text{M}$ ) at various DMSO-Water fractions under UV-lamp at 365 nm.

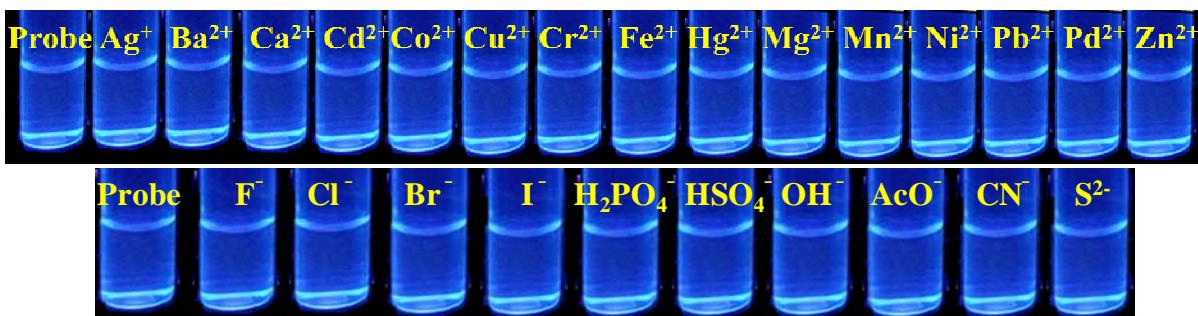

**Fig. S7.** Visual observation of interaction of **DIB** (50  $\mu\text{M}$ ) in 5% DMSO phosphate buffer solution at pH 7.4 with various metal ions and anions (20 equiv.) under UV light of 365 nm.

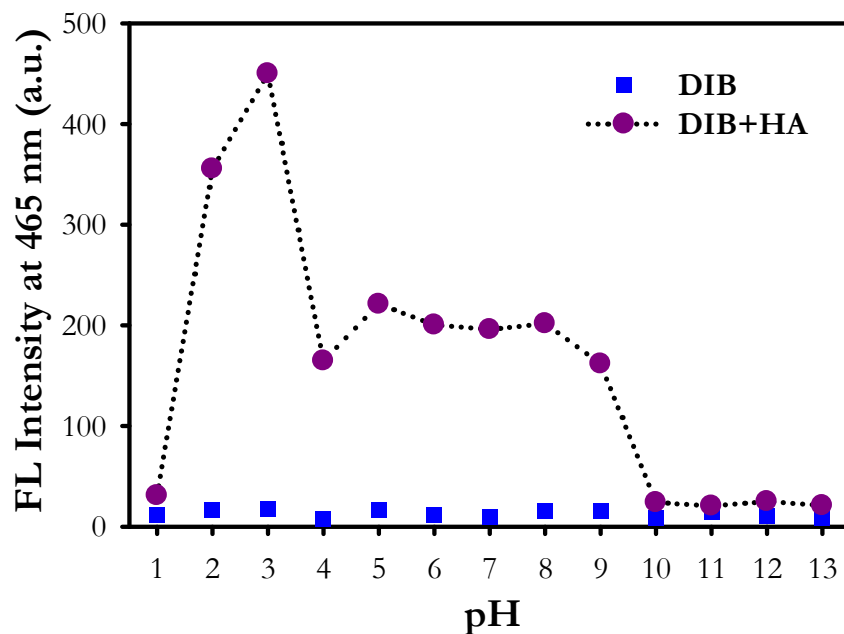

**Fig. S8.** Fluorescence intensity of **DIB** (50  $\mu\text{M}$ ) in absence (blue square) and in presence (purple circle) of HA (20 equiv.) at 465 nm within pH 1-13.

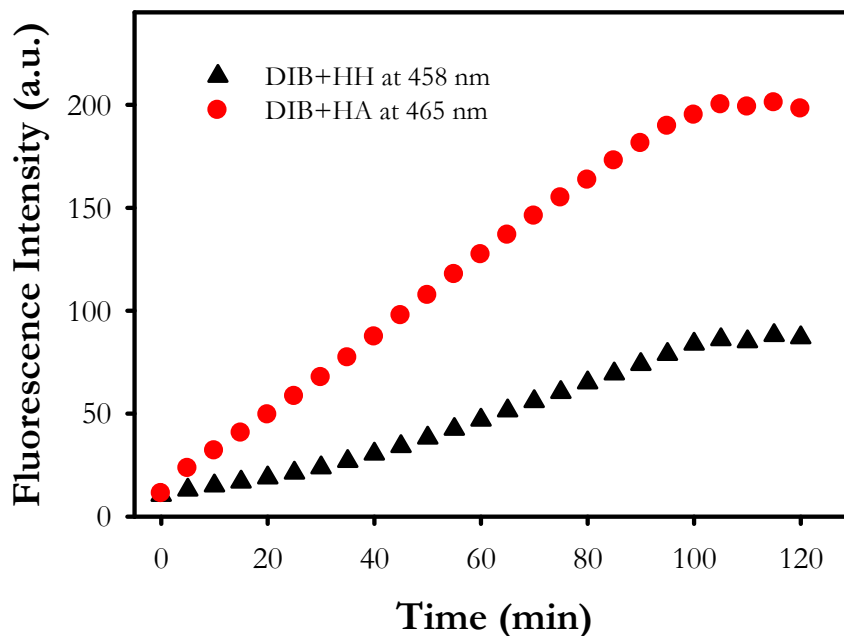

**Fig. S9.** Fluorescence response time of **DIB** (50  $\mu\text{M}$ ) in 5% DMSO phosphate buffer solution at pH 7.4 in presence of 20 equiv. of hydroxyl amine (HA) and hydrazine hydrate (HH) studied upto 120 minutes.

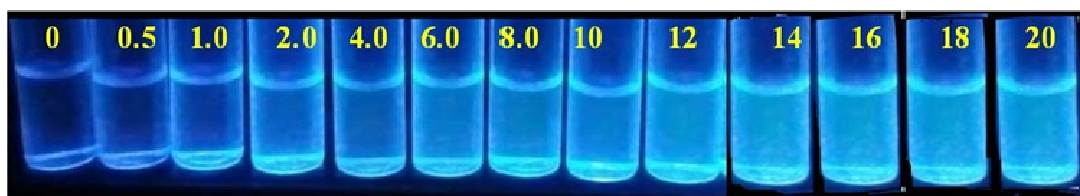

**Fig. S10.** Fluorescence colour changes for **DIB** in presence of 0.0 to 20.0 equiv. of HA after 2 hrs under UV-light at 365 nm in 5% DMSO phosphate buffer solution at pH 7.4.

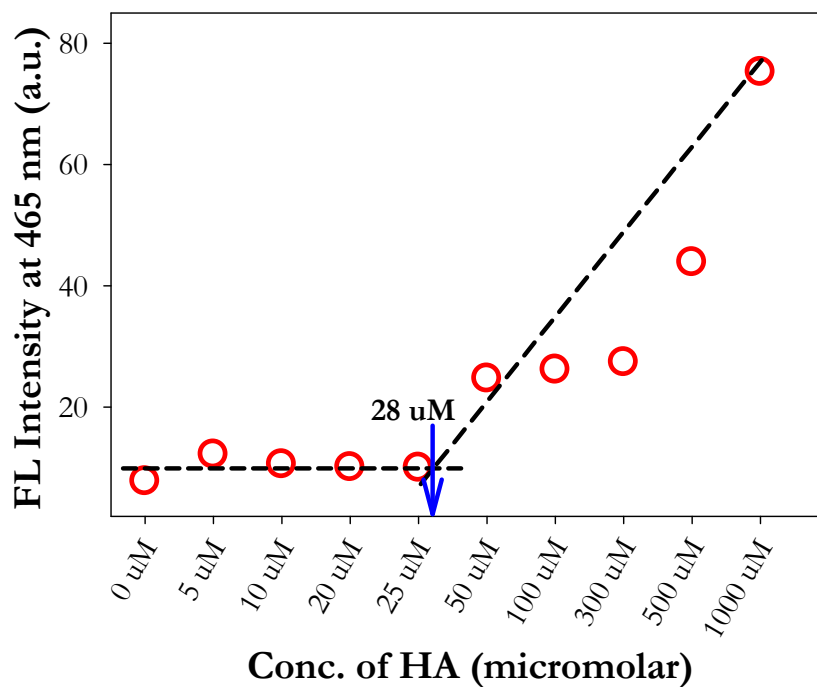

**Fig. S11.** Fluorescence intensity of DIB (50  $\mu\text{M}$ ) in 5% DMSO phosphate buffer solution at pH 7.4 in presence various concentration of HA.



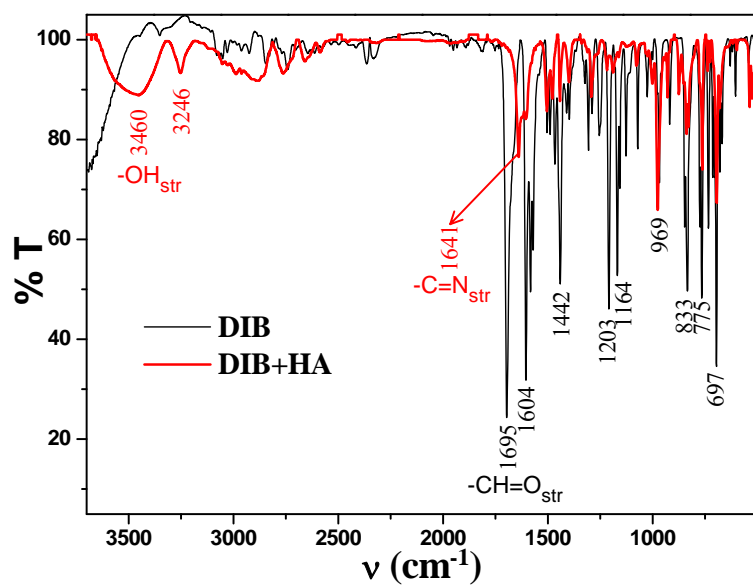

**Fig. S12.** Overlay FTIR spectra of **DIB** and Product of **DIB+HA**.

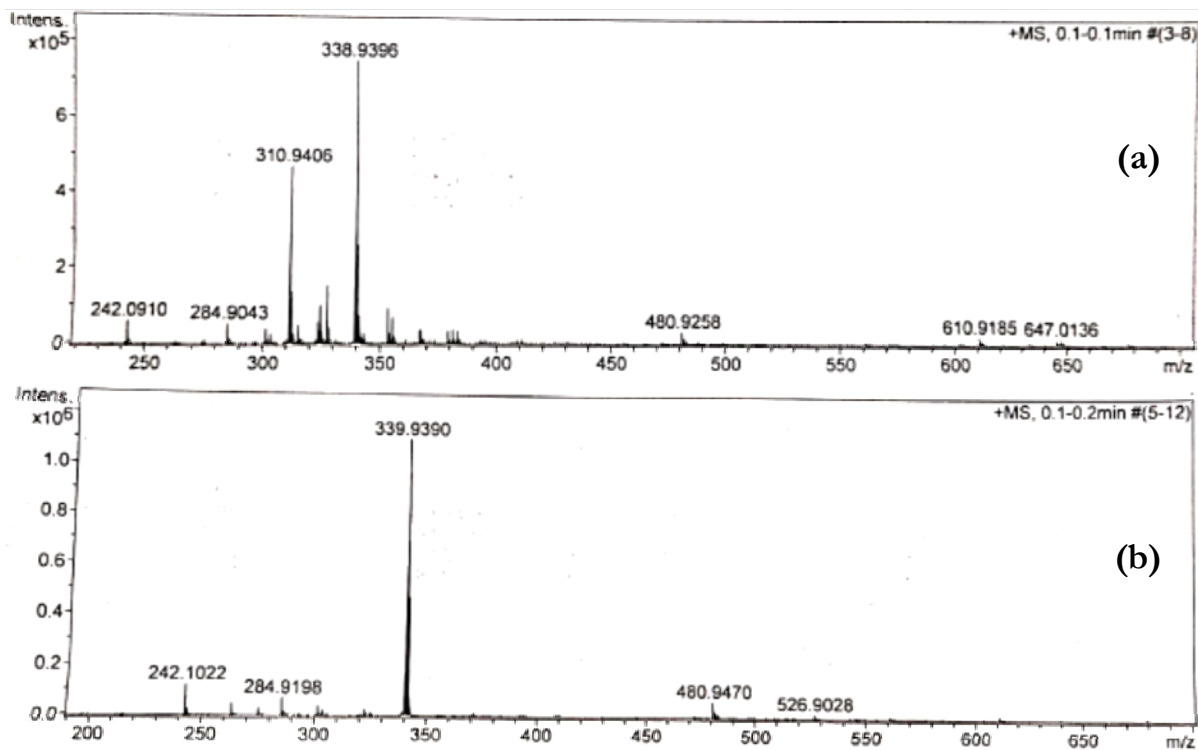

**Fig. S13.** ESI-MS of (a) hydrazone product (**C**) and (b) oxime product (**D**).

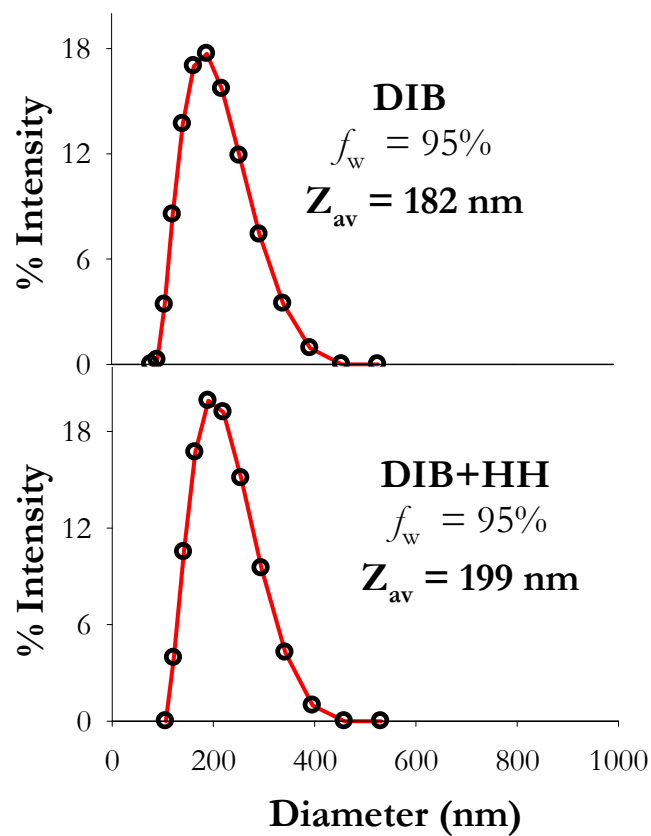

**Fig. S14.** Size distribution by DLS of **DIB** (50  $\mu\text{M}$ , Top Fig.) and **DIB+HH** (50  $\mu\text{M}$  each, Bottom Fig.) after an incubation period of 5 hr in 5% DMSO in Water.

### Atomic coordinates of optimized structures

| Coordinates of DIB probe |      |        |        |        | Coordinates of Intermediate A |      |        |        |        |
|--------------------------|------|--------|--------|--------|-------------------------------|------|--------|--------|--------|
| No                       | Atom | x-     | y-     | z-     | No                            | Atom | x-     | y-     | z-     |
| 1                        | N    | -1.896 | 2.333  | 0      | 1                             | N    | -0.146 | 0.812  | 0      |
| 2                        | C    | -2.753 | 3.447  | 0.064  | 2                             | C    | -1.016 | 1.921  | 0.158  |
| 3                        | N    | -2.027 | 4.565  | 0.139  | 3                             | N    | -0.29  | 3.051  | 0.283  |
| 4                        | C    | -0.675 | 4.185  | 0.112  | 4                             | C    | 1.038  | 2.709  | 0.206  |
| 5                        | C    | -0.576 | 2.763  | 0.067  | 5                             | C    | 1.171  | 1.263  | 0.089  |
| 6                        | H    | -2.189 | 1.372  | 0.076  | 6                             | H    | -0.41  | -0.149 | 0.163  |
| 7                        | C    | 0.331  | 5.211  | 0.023  | 7                             | C    | 2.051  | 3.737  | 0.12   |
| 8                        | C    | -0.033 | 6.546  | 0.379  | 8                             | C    | 1.757  | 5.038  | 0.614  |
| 9                        | C    | 1.655  | 4.976  | -0.457 | 9                             | C    | 3.311  | 3.52   | -0.507 |
| 10                       | C    | 0.896  | 7.576  | 0.309  | 10                            | C    | 2.694  | 6.061  | 0.521  |
| 11                       | H    | -1.048 | 6.722  | 0.712  | 11                            | H    | 0.788  | 5.207  | 1.069  |
| 12                       | C    | 2.572  | 6.017  | -0.533 | 12                            | C    | 4.239  | 4.558  | -0.607 |
| 13                       | H    | 1.935  | 3.988  | -0.799 | 13                            | H    | 3.534  | 2.556  | -0.948 |
| 14                       | C    | 2.205  | 7.32   | -0.143 | 14                            | C    | 3.944  | 5.827  | -0.087 |
| 15                       | H    | 0.611  | 8.581  | 0.598  | 15                            | H    | 2.461  | 7.044  | 0.917  |
| 16                       | H    | 3.571  | 5.828  | -0.914 | 16                            | H    | 5.19   | 4.381  | -1.1   |
| 17                       | H    | 2.927  | 8.128  | -0.205 | 17                            | H    | 4.671  | 6.629  | -0.162 |
| 18                       | C    | 0.522  | 1.818  | 0.131  | 18                            | C    | 2.275  | 0.359  | 0.152  |
| 19                       | C    | 0.449  | 0.587  | -0.573 | 19                            | C    | 2.161  | -0.96  | -0.408 |
| 20                       | C    | 1.658  | 2.059  | 0.948  | 20                            | C    | 3.487  | 0.681  | 0.851  |
| 21                       | C    | 1.479  | -0.35  | -0.479 | 21                            | C    | 3.208  | -1.869 | -0.307 |
| 22                       | H    | -0.397 | 0.391  | -1.226 | 22                            | H    | 1.274  | -1.227 | -0.975 |
| 23                       | C    | 2.682  | 1.116  | 1.036  | 23                            | C    | 4.521  | -0.244 | 0.943  |
| 24                       | H    | 1.707  | 2.967  | 1.538  | 24                            | H    | 3.572  | 1.634  | 1.36   |
| 25                       | C    | 2.601  | -0.091 | 0.323  | 25                            | C    | 4.401  | -1.523 | 0.363  |
| 26                       | H    | 1.413  | -1.278 | -1.038 | 26                            | H    | 3.109  | -2.852 | -0.758 |
| 27                       | H    | 3.537  | 1.312  | 1.676  | 27                            | H    | 5.423  | 0.018  | 1.488  |
| 28                       | H    | 3.399  | -0.823 | 0.398  | 28                            | H    | 5.211  | -2.241 | 0.444  |
| 29                       | C    | -4.204 | 3.347  | 0.06   | 29                            | C    | -2.441 | 1.819  | 0.153  |
| 30                       | C    | -4.865 | 2.093  | -0.045 | 30                            | C    | -3.104 | 0.576  | -0.085 |
| 31                       | C    | -4.992 | 4.521  | 0.173  | 31                            | C    | -3.241 | 2.97   | 0.403  |
| 32                       | C    | -6.252 | 2.021  | -0.033 | 32                            | C    | -4.494 | 0.504  | -0.064 |
| 33                       | H    | -4.3   | 1.168  | -0.147 | 33                            | H    | -2.534 | -0.322 | -0.305 |
| 34                       | C    | -6.377 | 4.451  | 0.186  | 34                            | C    | -4.625 | 2.883  | 0.42   |
| 35                       | H    | -4.489 | 5.48   | 0.249  | 35                            | H    | -2.743 | 3.917  | 0.58   |
| 36                       | C    | -7.046 | 3.194  | 0.084  | 36                            | C    | -5.281 | 1.644  | 0.186  |
| 37                       | H    | -6.746 | 1.056  | -0.117 | 37                            | H    | -4.982 | -0.45  | -0.242 |
| 38                       | H    | -6.983 | 5.346  | 0.273  | 38                            | H    | -5.218 | 3.772  | 0.611  |
| 39                       | C    | -8.496 | 3.11   | 0.096  | 39                            | C    | -6.783 | 1.533  | 0.243  |
| 40                       | H    | -8.922 | 2.095  | 0.011  | 40                            | H    | -7.11  | 0.553  | -0.135 |
| 41                       | O    | -9.276 | 4.111  | 0.198  | 41                            | O    | -7.3   | 1.492  | 1.625  |
|                          |      |        |        |        | 42                            | H    | -7.051 | 2.322  | 2.086  |
|                          |      |        |        |        | 43                            | N    | -7.411 | 2.641  | -0.461 |
|                          |      |        |        |        | 44                            | N    | -8.803 | 2.565  | -0.725 |
|                          |      |        |        |        | 45                            | H    | -9.11  | 1.672  | -1.113 |
|                          |      |        |        |        | 46                            | H    | -9.35  | 2.844  | 0.08   |
|                          |      |        |        |        | 47                            | H    | -6.894 | 3.014  | -1.247 |

| Coordinates of Intermediate B |      |         |        |        |
|-------------------------------|------|---------|--------|--------|
| No                            | Atom | x-      | y-     | z-     |
| 1                             | N    | -1.208  | 1.375  | 0      |
| 2                             | C    | -2.074  | 2.489  | 0.149  |
| 3                             | N    | -1.342  | 3.617  | 0.268  |
| 4                             | C    | -0.014  | 3.264  | 0.193  |
| 5                             | C    | 0.111   | 1.821  | 0.086  |
| 6                             | H    | -1.478  | 0.416  | 0.171  |
| 7                             | C    | 1.001   | 4.289  | 0.105  |
| 8                             | C    | 0.707   | 5.593  | 0.594  |
| 9                             | C    | 2.261   | 4.069  | -0.521 |
| 10                            | C    | 1.646   | 6.613  | 0.5    |
| 11                            | H    | -0.263  | 5.763  | 1.046  |
| 12                            | C    | 3.191   | 5.105  | -0.621 |
| 13                            | H    | 2.483   | 3.104  | -0.959 |
| 14                            | C    | 2.897   | 6.376  | -0.105 |
| 15                            | H    | 1.414   | 7.598  | 0.893  |
| 16                            | H    | 4.142   | 4.926  | -1.113 |
| 17                            | H    | 3.625   | 7.177  | -0.181 |
| 18                            | C    | 1.211   | 0.909  | 0.146  |
| 19                            | C    | 1.088   | -0.406 | -0.417 |
| 20                            | C    | 2.424   | 1.223  | 0.843  |
| 21                            | C    | 2.13    | -1.322 | -0.321 |
| 22                            | H    | 0.197   | -0.666 | -0.982 |
| 23                            | C    | 3.454   | 0.292  | 0.93   |
| 24                            | H    | 2.517   | 2.175  | 1.353  |
| 25                            | C    | 3.325   | -0.985 | 0.347  |
| 26                            | H    | 2.024   | -2.303 | -0.774 |
| 27                            | H    | 4.359   | 0.548  | 1.474  |
| 28                            | H    | 4.131   | -1.707 | 0.425  |
| 29                            | C    | -3.499  | 2.391  | 0.149  |
| 30                            | C    | -4.166  | 1.146  | -0.075 |
| 31                            | C    | -4.296  | 3.547  | 0.391  |
| 32                            | C    | -5.555  | 1.076  | -0.049 |
| 33                            | H    | -3.599  | 0.245  | -0.291 |
| 34                            | C    | -5.68   | 3.463  | 0.416  |
| 35                            | H    | -3.796  | 4.495  | 0.555  |
| 36                            | C    | -6.34   | 2.221  | 0.196  |
| 37                            | H    | -6.046  | 0.122  | -0.22  |
| 38                            | H    | -6.27   | 4.357  | 0.594  |
| 39                            | C    | -7.84   | 2.111  | 0.254  |
| 40                            | H    | -8.187  | 1.144  | -0.12  |
| 41                            | O    | -8.378  | 2.143  | 1.619  |
| 42                            | H    | -8.026  | 2.927  | 2.093  |
| 43                            | N    | -8.45   | 3.223  | -0.49  |
| 44                            | H    | -8.027  | 3.349  | -1.41  |
| 45                            | O    | -9.861  | 2.886  | -0.806 |
| 46                            | H    | -10.374 | 3.305  | -0.085 |

| Coordinates of Product C |      |         |        |        |
|--------------------------|------|---------|--------|--------|
| No                       | Atom | x-      | y-     | z-     |
| 1                        | N    | -3.438  | 2.646  | 0      |
| 2                        | C    | -4.197  | 1.462  | -0.075 |
| 3                        | N    | -3.352  | 0.397  | -0.135 |
| 4                        | C    | -2.069  | 0.881  | -0.102 |
| 5                        | C    | -2.083  | 2.321  | -0.059 |
| 6                        | H    | -3.8    | 3.576  | -0.144 |
| 7                        | C    | -0.947  | -0.047 | -0.02  |
| 8                        | C    | -1.092  | -1.345 | -0.567 |
| 9                        | C    | 0.259   | 0.274  | 0.648  |
| 10                       | C    | -0.056  | -2.274 | -0.479 |
| 11                       | H    | -2.027  | -1.598 | -1.054 |
| 12                       | C    | 1.29    | -0.664 | 0.743  |
| 13                       | H    | 0.373   | 1.244  | 1.119  |
| 14                       | C    | 1.143   | -1.938 | 0.174  |
| 15                       | H    | -0.178  | -3.261 | -0.913 |
| 16                       | H    | 2.204   | -0.406 | 1.269  |
| 17                       | H    | 1.947   | -2.663 | 0.245  |
| 18                       | C    | -1.069  | 3.339  | -0.133 |
| 19                       | C    | -1.314  | 4.637  | 0.414  |
| 20                       | C    | 0.167   | 3.129  | -0.813 |
| 21                       | C    | -0.363  | 5.649  | 0.307  |
| 22                       | H    | -2.229  | 4.822  | 0.971  |
| 23                       | C    | 1.108   | 4.15   | -0.915 |
| 24                       | H    | 0.358   | 2.174  | -1.29  |
| 25                       | C    | 0.856   | 5.418  | -0.355 |
| 26                       | H    | -0.564  | 6.621  | 0.748  |
| 27                       | H    | 2.036   | 3.969  | -1.448 |
| 28                       | H    | 1.593   | 6.211  | -0.44  |
| 29                       | C    | -5.617  | 1.414  | -0.073 |
| 30                       | C    | -6.421  | 2.591  | 0.061  |
| 31                       | C    | -6.291  | 0.157  | -0.221 |
| 32                       | C    | -7.8    | 2.524  | 0.041  |
| 33                       | H    | -5.95   | 3.562  | 0.198  |
| 34                       | C    | -7.67   | 0.096  | -0.241 |
| 35                       | H    | -5.691  | -0.741 | -0.316 |
| 36                       | C    | -8.473  | 1.272  | -0.114 |
| 37                       | H    | -8.399  | 3.421  | 0.148  |
| 38                       | H    | -8.163  | -0.867 | -0.355 |
| 39                       | C    | -9.905  | 1.178  | -0.139 |
| 40                       | H    | -10.346 | 0.18   | -0.258 |
| 41                       | N    | -10.684 | 2.238  | -0.026 |
| 42                       | N    | -12.035 | 2.041  | -0.063 |
| 43                       | H    | -12.453 | 1.121  | -0.154 |
| 44                       | H    | -12.61  | 2.858  | 0.038  |

**Coordinates of Product D**

| <b>No</b> | <b>Atom</b> | <b>x-</b> | <b>y-</b> | <b>z-</b> |
|-----------|-------------|-----------|-----------|-----------|
| 1         | N           | -0.167    | 0.333     | 0         |
| 2         | C           | 0.594     | -0.849    | 0.066     |
| 3         | N           | -0.237    | -1.909    | 0.132     |
| 4         | C           | -1.537    | -1.419    | 0.106     |
| 5         | C           | -1.519    | 0.014     | 0.066     |
| 6         | H           | 0.206     | 1.265     | 0.102     |
| 7         | C           | -2.641    | -2.351    | 0.022     |
| 8         | C           | -2.427    | -3.692    | 0.446     |
| 9         | C           | -3.909    | -2.009    | -0.525    |
| 10        | C           | -3.451    | -4.631    | 0.372     |
| 11        | H           | -1.45     | -3.955    | 0.832     |
| 12        | C           | -4.924    | -2.959    | -0.607    |
| 13        | H           | -4.076    | -1.014    | -0.917    |
| 14        | C           | -4.706    | -4.271    | -0.15     |
| 15        | H           | -3.277    | -5.646    | 0.714     |
| 16        | H           | -5.881    | -2.688    | -1.039    |
| 17        | H           | -5.501    | -5.008    | -0.214    |
| 18        | C           | -2.532    | 1.041     | 0.134     |
| 19        | C           | -2.325    | 2.295     | -0.506    |
| 20        | C           | -3.721    | 0.867     | 0.896     |
| 21        | C           | -3.275    | 3.311     | -0.41     |
| 22        | H           | -1.44     | 2.446     | -1.118    |
| 23        | C           | -4.664    | 1.89      | 0.987     |
| 24        | H           | -3.874    | -0.057    | 1.442     |
| 25        | C           | -4.451    | 3.116     | 0.334     |
| 26        | H           | -3.106    | 4.254     | -0.921    |
| 27        | H           | -5.558    | 1.742     | 1.583     |
| 28        | H           | -5.186    | 3.911     | 0.41      |
| 29        | C           | 2.031     | -0.881    | 0.068     |
| 30        | C           | 2.815     | 0.302     | -0.051    |
| 31        | C           | 2.712     | -2.128    | 0.203     |
| 32        | C           | 4.198     | 0.254     | -0.03     |
| 33        | H           | 2.336     | 1.272     | -0.175    |
| 34        | C           | 4.094     | -2.177    | 0.226     |
| 35        | H           | 2.125     | -3.036    | 0.287     |
| 36        | C           | 4.886     | -0.993    | 0.113     |
| 37        | H           | 4.783     | 1.162     | -0.125    |
| 38        | H           | 4.597     | -3.135    | 0.331     |
| 39        | C           | 6.321     | -1.074    | 0.142     |
| 40        | H           | 6.793     | -2.05     | 0.249     |
| 41        | N           | 7.079     | 0.002     | 0.042     |
| 42        | O           | 8.496     | -0.422    | 0.106     |
| 43        | H           | 8.984     | 0.422     | 0.027     |
